# Supplementary material
Source: PubMed Central journal article supplement (PMC6344384)
Supplement: mmc1.pdf [file mmc1.pdf]

## Sleep Timing, Stability, and BP in the Sueño Ancillary Study of the Hispanic Community Health Study/Study of Latinos

*Sabra M. Abbott, MD, PhD; Jia Weng, PhD; Kathryn J. Reid, PhD;  
Martha L. Daviglius, MD, PhD; Linda C. Gallo, PhD; Jose S. Loredó, MD, MPH;  
Sharmilee M. Nyenhuis, MD; Alberto R. Ramos, MD; Neomi A. Shah, MD, MPH;  
Daniela Sotres-Alvarez, DrPH; Sanjay R. Patel, MD; and Phyllis C. Zee, MD, PhD*

CHEST 2019; 155(1):60-68

*Online supplements are not copyedited prior to posting and the author(s) take full responsibility for the accuracy of all data.*

© 2018 AMERICAN COLLEGE OF CHEST PHYSICIANS. Reproduction of this article is prohibited without written permission from the American College of Chest Physicians. See online for more details. DOI: 10.1016/j.chest.2018.09.018

**e-Appendix 1.**

**Sites Baseline IRB**

Albert Einstein College of Medicine CCI #: 2006-535

University of Miami FWA00002247

Northwestern University 200601-0471

University of California, San Diego 3677

University of North Carolina 07-1003

**Sites V2 IRB**

Actigraphy Sites

Albert Einstein College of Medicine 2009-219

University of Miami 20100922

Northwestern University STU00034827

University of California, San Diego 101425

Coordinating Centers

University of North Carolina 10-1292

Case Medical Center '06-10-02

Partners Healthcare System 2010-P-002336

University of Pittsburgh PRO16020627
